# Supplementary material for: Perceived posttraumatic growth after interpersonal trauma and subsequent well-being among young Colombian adults: A longitudinal analysis
Source: PubMed Central journal article supplement (PMC9667110; doi:10.3389/fpsyg.2022.993609), 2022-11-02
Supplement: Data_Sheet_1.pdf [file Data_Sheet_1.pdf]

Perceived Posttraumatic Growth After Interpersonal Trauma and Subsequent Well-being Among  
Young Colombian Adults: A Longitudinal Analysis

**SUPPLEMENTAL MATERIAL**

## Supplemental Table S1

*Summary Statistics for Types of Transgressions*

| Transgressions                                          | <i>n</i> | %      |
|---------------------------------------------------------|----------|--------|
| Infidelity                                              | 43       | 6.76%  |
| Deception                                               | 57       | 8.96%  |
| Broken promise(s)                                       | 21       | 3.30%  |
| Disclosed a secret(s)                                   | 15       | 2.36%  |
| Sexual abuse/violence                                   | 13       | 2.04%  |
| Physical abuse/violence                                 | 28       | 4.40%  |
| Verbal/emotional abuse                                  | 218      | 34.28% |
| Inappropriate communication/harassment                  | 22       | 3.46%  |
| Discrimination                                          | 30       | 4.72%  |
| Act of war/violent hostility/rioting                    | 7        | 1.10%  |
| Gaslighting/distancing/ignoring                         | 20       | 3.14%  |
| Sabotage of social connections/defamation of reputation | 7        | 1.10%  |
| Threats to property/resources                           | 4        | 0.63%  |
| Accusations/moral affronts                              | 11       | 1.73%  |
| Indifference                                            | 25       | 3.93%  |
| Harm to another person(s)                               | 12       | 1.89%  |
| Insensitive communication/behavior                      | 14       | 2.20%  |
| Other <sup>a</sup>                                      | 89       | 13.99% |

*Note.* Cumulative percentage may exceed 100% due to rounding. <sup>a</sup>Includes transgressions that participants were unable to classify under any of the other specific transgression categories.

Supplemental Table S2

*Summary of Measures*

| Subscale names                                                       | Scale items                                                                                                                                                                                                                                                                                                                                                                                                                        | Response scale                                                                                                                                                   | Variable type                        | Alpha                                            |
|----------------------------------------------------------------------|------------------------------------------------------------------------------------------------------------------------------------------------------------------------------------------------------------------------------------------------------------------------------------------------------------------------------------------------------------------------------------------------------------------------------------|------------------------------------------------------------------------------------------------------------------------------------------------------------------|--------------------------------------|--------------------------------------------------|
| <b>Posttraumatic Growth Inventory-Short Form (Cann et al., 2010)</b> |                                                                                                                                                                                                                                                                                                                                                                                                                                    |                                                                                                                                                                  |                                      |                                                  |
| Overall perceived posttraumatic growth                               | All items listed below.                                                                                                                                                                                                                                                                                                                                                                                                            |                                                                                                                                                                  | Continuous (average of the 10 items) | Wave 1: $\alpha = .91$<br>Wave 2: $\alpha = .94$ |
| Relating to others                                                   | I have a greater sense of closeness with others.                                                                                                                                                                                                                                                                                                                                                                                   | 0 ( <i>I did not experience this change as a result of my crisis</i> ) to 5 ( <i>I experienced this change to a very great degree as a result of my crisis</i> ) | Continuous (average of the 2 items)  | Wave 1: $\alpha = .75$<br>Wave 2: $\alpha = .82$ |
| New opportunities                                                    | I learned a great deal about how wonderful people are.<br>I am able to do better things with my life.                                                                                                                                                                                                                                                                                                                              |                                                                                                                                                                  | Continuous (average of the 2 items)  | Wave 1: $\alpha = .80$<br>Wave 2: $\alpha = .82$ |
| Personal strength                                                    | I established a new path for my life.<br>I know better that I can handle difficulties.                                                                                                                                                                                                                                                                                                                                             |                                                                                                                                                                  | Continuous (average of the 2 items)  | Wave 1: $\alpha = .81$<br>Wave 2: $\alpha = .85$ |
| Spiritual change                                                     | I discovered that I'm stronger than I thought I was.<br>I have a better understanding of spiritual matters.                                                                                                                                                                                                                                                                                                                        |                                                                                                                                                                  | Continuous (average of the 2 items)  | Wave 1: $\alpha = .82$<br>Wave 2: $\alpha = .84$ |
| Appreciation of life                                                 | I have a stronger religious faith.                                                                                                                                                                                                                                                                                                                                                                                                 |                                                                                                                                                                  | Continuous (average of the 2 items)  | Wave 1: $\alpha = .57$<br>Wave 2: $\alpha = .68$ |
|                                                                      | I changed my priorities about what is important in life.<br>I have a greater appreciation for the value of my own life.                                                                                                                                                                                                                                                                                                            |                                                                                                                                                                  |                                      |                                                  |
| <b>State Hope Scale (Snyder et al., 1996)</b>                        |                                                                                                                                                                                                                                                                                                                                                                                                                                    |                                                                                                                                                                  |                                      |                                                  |
| State hope                                                           | If I should find myself in a jam, I could think of many ways to get out of it.<br>At the present time, I am energetically pursuing my goals.<br>There are lots of ways around any problem that I am facing now.<br>Right now I see myself as being pretty successful.<br>I can think of many ways to reach my current goals.<br>At this time, I am meeting the goals that I have set for myself.                                   | 1 ( <i>Definitely false</i> ) to 8 ( <i>Definitely true</i> )                                                                                                    | Continuous (average of the 6 items)  | Wave 1: $\alpha = .85$<br>Wave 3: $\alpha = .92$ |
| <b>Trait Forgivingness Scale (Berry et al., 2005)</b>                |                                                                                                                                                                                                                                                                                                                                                                                                                                    |                                                                                                                                                                  |                                      |                                                  |
| Trait forgivingness                                                  | People close to me probably think I hold a grudge too long.<br>I can forgive a friend for almost anything.<br>If someone treats me badly, I treat him or her the same.<br>I try to forgive others even when they don't feel guilty for what they did.<br>I can usually forgive and forget an insult.<br>I feel bitter about many of my relationships.<br>Even after I forgive someone, things often come back to me that I resent. | 1 ( <i>Strongly disagree</i> ) to 5 ( <i>Strongly agree</i> )                                                                                                    | Continuous (average of the 10 items) | Wave 1: $\alpha = .78$<br>Wave 3: $\alpha = .82$ |

There are some things for which I could never forgive even a loved one.

I have always forgiven those who have hurt me.

I am a forgiving person.

**Brief Symptoms Inventory 18 (Derogatis, 2001)**

|                     |                                             |                                                   |                                     |                                                  |
|---------------------|---------------------------------------------|---------------------------------------------------|-------------------------------------|--------------------------------------------------|
| Depression symptoms | Feeling no interest in things.              | 0 ( <i>Not at all</i> ) to 4 ( <i>Extremely</i> ) | Continuous (average of the 6 items) | Wave 1: $\alpha = .83$<br>Wave 3: $\alpha = .92$ |
|                     | Feeling lonely.                             |                                                   |                                     |                                                  |
|                     | Feeling blue.                               |                                                   |                                     |                                                  |
|                     | Feelings of worthlessness.                  |                                                   |                                     |                                                  |
|                     | Feeling hopeless about the future.          |                                                   |                                     |                                                  |
|                     | Thoughts of ending your life.               |                                                   |                                     |                                                  |
| Anxiety symptoms    | Nervousness or shakiness inside.            | 0 ( <i>Not at all</i> ) to 4 ( <i>Extremely</i> ) | Continuous (average of the 6 items) | Wave 1: $\alpha = .87$<br>Wave 3: $\alpha = .95$ |
|                     | Feeling tense or keyed up.                  |                                                   |                                     |                                                  |
|                     | Suddenly scared for no reason.              |                                                   |                                     |                                                  |
|                     | Feeling so restless you couldn't sit still. |                                                   |                                     |                                                  |
|                     | Spells of terror or panic.                  |                                                   |                                     |                                                  |
| Feeling fearful.    |                                             |                                                   |                                     |                                                  |

**Secure Flourishing Index (VanderWeele, 2017)**

|                             |                                                                                                  |                                                                           |                          |   |
|-----------------------------|--------------------------------------------------------------------------------------------------|---------------------------------------------------------------------------|--------------------------|---|
| Life satisfaction           | Overall, how satisfied are you with life as a whole these days?                                  | 0 ( <i>Not satisfied at all</i> ) to 10 ( <i>Completely satisfied</i> )   | Continuous (single item) | - |
| Happiness                   | In general, how happy or unhappy do you usually feel?                                            | 0 ( <i>Extremely unhappy</i> ) to 10 ( <i>Extremely happy</i> )           | Continuous (single item) | - |
| Physical health             | In general, how would you rate your physical health?                                             | 0 ( <i>Poor</i> ) to 10 ( <i>Excellent</i> )                              | Continuous (single item) | - |
| Mental health               | How would you rate your overall mental health?                                                   | 0 ( <i>Poor</i> ) to 10 ( <i>Excellent</i> )                              | Continuous (single item) | - |
| Meaning                     | Overall, to what extent do you feel the things you do in your life are worthwhile?               | 0 ( <i>Not at all worthwhile</i> ) to 10 ( <i>Completely worthwhile</i> ) | Continuous (single item) | - |
| Purpose                     | I understand my purpose in life.                                                                 | 0 ( <i>Strongly disagree</i> ) to 10 ( <i>Strongly agree</i> )            | Continuous (single item) | - |
| Orientation to promote good | I always act to promote good in all circumstances, even in difficult and challenging situations. | 0 ( <i>Not true of me</i> ) to 10 ( <i>Completely true of me</i> )        | Continuous (single item) | - |
| Delayed gratification       | I am always able to give up some happiness now for greater happiness later.                      | 0 ( <i>Not true of me</i> ) to 10 ( <i>Completely true of me</i> )        | Continuous (single item) | - |
| Content with relationships  | I am content with my friendships and relationships.                                              | 0 ( <i>Strongly disagree</i> ) to 10 ( <i>Strongly agree</i> )            | Continuous (single item) | - |

|                                                              |                                                                                                                                                                                                                                                                                                                                                                                                                                                                       |                                                                       |                                     |                                                  |
|--------------------------------------------------------------|-----------------------------------------------------------------------------------------------------------------------------------------------------------------------------------------------------------------------------------------------------------------------------------------------------------------------------------------------------------------------------------------------------------------------------------------------------------------------|-----------------------------------------------------------------------|-------------------------------------|--------------------------------------------------|
| Satisfying relationships                                     | My relationships are as satisfying as I would want them to be.                                                                                                                                                                                                                                                                                                                                                                                                        | 0 ( <i>Strongly disagree</i> ) to 10 ( <i>Strongly agree</i> )        | Continuous (single item)            | -                                                |
| Financial/material stability                                 | How often do you worry about being able to meet normal monthly living expenses?<br>How often do you worry about safety, food, or housing?                                                                                                                                                                                                                                                                                                                             | 0 ( <i>Worry all of the time</i> ) to 10 ( <i>Do not ever worry</i> ) | Continuous (average of the 2 items) | Wave 1: $\alpha = .88$                           |
| <b>UCLA Loneliness Scale (Russell et al., 1980)</b>          |                                                                                                                                                                                                                                                                                                                                                                                                                                                                       |                                                                       |                                     |                                                  |
| Loneliness                                                   | How often do you feel that you lack companionship?<br>How often do you feel left out?<br>How often do you feel isolated from others?                                                                                                                                                                                                                                                                                                                                  | 1 ( <i>Never</i> ) to 3 ( <i>Often</i> )                              | Continuous (average of the 3 items) | Wave 1: $\alpha = .81$<br>Wave 3: $\alpha = .88$ |
| <b>Single-item Sleep Quality Scale (Snyder et al., 2018)</b> |                                                                                                                                                                                                                                                                                                                                                                                                                                                                       |                                                                       |                                     |                                                  |
| Sleep quality                                                | During the past 7 days, how would you rate the overall quality of your sleep?                                                                                                                                                                                                                                                                                                                                                                                         | 1 ( <i>Terrible</i> ) to 5 ( <i>Excellent</i> )                       | Continuous (single item)            | -                                                |
| <b>Personal Suffering Assessment (VanderWeele, 2019)</b>     |                                                                                                                                                                                                                                                                                                                                                                                                                                                                       |                                                                       |                                     |                                                  |
| Subjective suffering                                         | The intensity of my suffering feels intolerable.<br>The length of time I have been suffering, or expect to suffer, feels intolerable.<br>I feel powerless to stop my current experience of suffering.<br>The suffering I have been experiencing affects all aspects of my life.<br>Certain purposes of my life have been badly disrupted because of the suffering I have been experiencing.<br>The suffering I have been experiencing threatens who I am as a person. | 0 ( <i>Strongly disagree</i> ) to 10 ( <i>Strongly agree</i> )        | Continuous (average of the 6 items) | Wave 1: $\alpha = .81$<br>Wave 3: $\alpha = .97$ |

---

## References

- Cann, A., Calhoun, L. G., Tedeschi, R. G., Taku, K., Vishnevsky, T., Triplett, K. N., & Danhauer, S. C. (2010). A short form of the Posttraumatic Growth Inventory. *Anxiety, Stress, & Coping, 23*(2), 127–137. <https://doi.org/10.1080/10615800903094273>
- Russell, D., Peplau, L. A., & Cutrona, C. E. (1980). The revised UCLA Loneliness Scale: concurrent and discriminant validity evidence. *Journal of Personality and Social Psychology, 39*(3), 472–480. <https://doi.org/10.1037//0022-3514.39.3.472>
- Berry, J. W., Worthington, E. L., Jr., O'Connor, L. E., Parrott, L., III, & Wade, N. G. (2005). Forgivingness, vengeful rumination, and affective traits. *Journal of Personality, 73*(1), 183–226. <https://doi.org/10.1111/j.1467-6494.2004.00308.x>
- Derogatis, L. (2001). *Brief Symptoms Inventory 18: Administration, scoring, and procedures manual*. NCS Pearson.
- Snyder, C. R., Sympson, S. C., Ybasco, F. C., Borders, T. F., Babyak, M. A., & Higgins, R. L. (1996). Development and validation of the State Hope Scale. *Journal of Personality and Social Psychology, 70*(2), 321–335. <https://doi.org/10.1037//0022-3514.70.2.321>
- Snyder, E., Cai, B., DeMuro, C., Morrison, M. F., & Ball, W. (2018). A new single-item sleep quality scale: Results of psychometric evaluation in patients with chronic primary insomnia and depression. *Journal of Clinical Sleep Medicine, 14*(11), 1849–1857. <https://doi.org/10.5664/jcsm.7478>
- VanderWeele, T. J. (2017). On the promotion of human flourishing. *Proceedings of the National Academy of Sciences of the United States of America, 114*(31), 8148–8156. <https://doi.org/10.1073/pnas.1702996114>

VanderWeele, T. J. (2019). Suffering and response: Directions in empirical research. *Social Science & Medicine*, 224, 58–66. <https://doi.org/10.1016/j.socscimed.2019.01.041>
